# Supplementary material for: Arrangement of Hydrogen Bonds in Aqueous Solutions of Different Globular Proteins
Source: MDPI journal article supplement (doi:10.3390/ijms231911381), 2022-09-27
Supplement: s1 [file s1]

**Supplementary Data for Arrangement of hydrogen bonds in aqueous solutions of different globular proteins**

**Table S1.** Relative contributions of Gaussian components I-IV at indicated fixed wavelengths obtained from the literature [1] for all proteins and concentrations measured.

| Protein    | Concentration (mg/mL) | Component I                   |              | Component II                  |              | Component III                 |              | Component IV                  |              |
|------------|-----------------------|-------------------------------|--------------|-------------------------------|--------------|-------------------------------|--------------|-------------------------------|--------------|
|            |                       | %<br>3080<br>cm <sup>-1</sup> | Error<br>(±) | %<br>3230<br>cm <sup>-1</sup> | Error<br>(±) | %<br>3400<br>cm <sup>-1</sup> | Error<br>(±) | %<br>3550<br>cm <sup>-1</sup> | Error<br>(±) |
| HSA        | 0                     | 10.64                         | 0.052        | 45.83                         | 0.45         | 32.27                         | 0.33         | 11.26                         | 0.13         |
|            | 50                    | 11.46                         | 0.042        | 45.12                         | 0.37         | 32.33                         | 0.07         | 11.09                         | 0.11         |
|            | 100                   | 12.09                         | 0.057        | 44.4                          | 0.27         | 32.65                         | 0.014        | 10.86                         | 0.078        |
|            | 150                   | 12.73                         | 0.010        | 43.68                         | 0.15         | 33.1                          | 0.035        | 10.49                         | 0.11         |
|            | 200                   | 13.35                         | 0.035        | 42.96                         | 0.01         | 33.67                         | 0.057        | 10.02                         | 0.1          |
|            | 250                   | 14.02                         | 0.078        | 42.24                         | 0.29         | 34.46                         | 0.014        | 9.28                          | 0.1          |
| BSA        | 0                     | 10.64                         | 0.052        | 45.83                         | 0.45         | 32.27                         | 0.33         | 11.26                         | 0.13         |
|            | 50                    | 11.39                         | 0.010        | 45.02                         | 0.001        | 32.6                          | 0.001        | 10.99                         | 0.045        |
|            | 100                   | 11.99                         | 0            | 44.24                         | 0.12         | 32.99                         | 0.001        | 10.78                         | 0.073        |
|            | 150                   | 12.78                         | 0            | 43.25                         | 0.21         | 33.48                         | 0.001        | 10.49                         | 0.063        |
|            | 200                   | 13.58                         | 0.014        | 42.25                         | 0.074        | 34.07                         | 0.014        | 10.1                          | 0.082        |
|            | 250                   | 14.33                         | 0.014        | 41.26                         | 0.021        | 34.74                         | 0.014        | 9.67                          | 0.12         |
|            | 300                   | 15.03                         | 0.014        | 40.2                          | 0.24         | 35.49                         | 0.02         | 9.28                          | 0.11         |
| γ-Globulin | 0                     | 10.64                         | 0.052        | 45.83                         | 0.45         | 32.27                         | 0.33         | 11.26                         | 0.13         |
|            | 50                    | 11.46                         | 0.010        | 44.85                         | 0.243        | 32.57                         | 0.11         | 11.12                         | 0.07         |
|            | 100                   | 12.15                         | 0.014        | 43.96                         | 0.042        | 32.96                         | 0.042        | 10.93                         | 0.014        |
|            | 150                   | 12.88                         | 0.042        | 43.05                         | 0.11         | 33.31                         | 0.07         | 10.76                         | 0.12         |
|            | 200                   | 13.56                         | 0.03         | 42.17                         | 0.014        | 33.67                         | 0.113        | 10.6                          | 0.07         |
|            | 250                   | 14.36                         | 0.014        | 41.14                         | 0.014        | 34.11                         | 0.085        | 10.39                         | 0.021        |
| Ovalbumin  | 0                     | 10.64                         | 0.052        | 45.83                         | 0.45         | 32.27                         | 0.33         | 11.26                         | 0.13         |
|            | 50                    | 11.4                          | 0.035        | 45.21                         | 0.12         | 32.46                         | 0.021        | 10.93                         | 0.11         |
|            | 100                   | 12.07                         | 0.014        | 44.34                         | 0.1          | 32.8                          | 0.021        | 10.79                         | 0.056        |
|            | 150                   | 12.72                         | 0            | 43.51                         | 0.11         | 33.16                         | 0.035        | 10.61                         | 0.07         |
|            | 200                   | 13.47                         | 0.078        | 42.54                         | 0.11         | 33.66                         | 0.049        | 10.33                         | 0.072        |
|            | 250                   | 14.19                         | 0.081        | 41.61                         | 0.15         | 34.12                         | 0.001        | 10.08                         | 0.042        |
| Lysozyme   | 0                     | 10.64                         | 0.052        | 45.83                         | 0.45         | 32.27                         | 0.33         | 11.26                         | 0.13         |
|            | 20                    | 10.92                         | 0.011        | 45.67                         | 0.0010       | 32.36                         | 0.02         | 11.1                          | 0.05         |
|            | 40                    | 11.13                         | 0.082        | 45.38                         | 0.0010       | 32.46                         | 0.01         | 11.03                         | 0.025        |
|            | 60                    | 11.33                         | 0.078        | 45.06                         | 0.0040       | 32.64                         | 0.02         | 10.97                         | 0.021        |
|            | 80                    | 11.54                         | 0.132        | 44.72                         | 0.0070       | 32.81                         | 0.02         | 10.93                         | 0.018        |
|            | 100                   | 11.71                         | 0.12         | 44.47                         | 0.004        | 32.94                         | 0.01         | 10.88                         | 0.015        |
| β-LGA      | 0                     | 10.64                         | 0.052        | 45.83                         | 0.005        | 32.27                         | 0.33         | 11.26                         | 0.13         |
|            | 50                    | 11.62                         | 0.034        | 44.13                         | 0.0010       | 33.03                         | 0.02         | 11.22                         | 0.076        |
|            | 100                   | 12.78                         | 0.07         | 42.86                         | 0.0010       | 33.32                         | 0.06         | 11.04                         | 0.081        |
|            | 150                   | 13.73                         | 0.042        | 41.84                         | 0.0010       | 33.57                         | 0.08         | 10.86                         | 0.054        |
|            | 200                   | 14.82                         | 0.1          | 40.7                          | 0.033        | 33.82                         | 0.06         | 10.66                         | 0.061        |
|            | 250                   | 16.06                         | 0.12         | 39.41                         | 0.0010       | 34.17                         | 0.1          | 10.36                         | 0.038        |
| β-LGB      | 0                     | 10.64                         | 0.052        | 45.83                         | 0.010        | 32.27                         | 0.33         | 11.26                         | 0.13         |
|            | 50                    | 11.49                         | 0.042        | 44.25                         | 0.010        | 33.01                         | 0.007        | 11.25                         | 0.034        |
|            | 100                   | 12.51                         | 0.021        | 43.09                         | 0.010        | 33.38                         | 0.007        | 11.02                         | 0.027        |
|            | 150                   | 13.4                          | 0.014        | 42.05                         | 0.010        | 33.71                         | 0.07         | 10.84                         | 0.023        |

|                    |     |       |       |       |       |       |       |       |       |
|--------------------|-----|-------|-------|-------|-------|-------|-------|-------|-------|
|                    | 200 | 14.31 | 0.11  | 40.53 | 0.010 | 34.29 | 0     | 10.87 | 0.031 |
|                    | 250 | 15.17 | 0.05  | 39.88 | 0.010 | 34.63 | 0.06  | 10.32 | 0.027 |
| <b>Trypsinogen</b> | 0   | 10.64 | 0.052 | 45.83 | 0.010 | 32.27 | 0.33  | 11.26 | 0.13  |
|                    | 50  | 11.37 | 0.021 | 44.23 | 0.010 | 33.19 | 0.06  | 11.21 | 0.11  |
|                    | 100 | 11.95 | 0.010 | 43.5  | 0.010 | 33.47 | 0.06  | 11.08 | 0.074 |
|                    | 150 | 12.65 | 0.014 | 42.54 | 0     | 33.91 | 0.04  | 10.9  | 0.058 |
|                    | 200 | 13.23 | 0.064 | 41.83 | 0.010 | 34.25 | 0.051 | 10.69 | 0.025 |
|                    | 250 | 13.92 | 0.078 | 40.85 | 0.010 | 34.78 | 0.071 | 10.45 | 0.059 |

**Table S2.** Solvent hydrogen bond donor (HBD) acidity,  $\alpha_{24}$ , in solutions of proteins.

| Protein          | Concentration (mg/mL) | HBD acidity   |                 | Component II            |                 | Component III           |                 |
|------------------|-----------------------|---------------|-----------------|-------------------------|-----------------|-------------------------|-----------------|
|                  |                       | $\alpha_{24}$ | Error ( $\pm$ ) | % 3230 $\text{cm}^{-1}$ | Error ( $\pm$ ) | % 3400 $\text{cm}^{-1}$ | Error ( $\pm$ ) |
| <b>HSA</b>       | 0                     | 1.376         | 0.003           | 45.83                   | 0.45            | 32.27                   | 0.33            |
|                  | 50                    | 1.374         | 0.002           | 45.12                   | 0.37            | 32.33                   | 0.07            |
|                  | 100                   | 1.371         | 0.003           | 44.4                    | 0.27            | 32.65                   | 0.014           |
|                  | 150                   | 1.368         | 0.003           | 43.68                   | 0.15            | 33.1                    | 0.035           |
|                  | 200                   | 1.365         | 0.002           | 42.96                   | 0.01            | 33.67                   | 0.057           |
|                  | 250                   | 1.362         | 0.002           | 42.24                   | 0.29            | 34.46                   | 0.014           |
| <b>BSA</b>       | 0                     | 1.376         | 0.003           |                         |                 | 32.27                   | 0.33            |
|                  | 75                    | 1.371         | 0.002           |                         |                 | 32.8                    | 0.014           |
|                  | 150                   | 1.367         | 0.002           |                         |                 | 33.49                   | 0.014           |
|                  | 300                   | 1.354         | 0.002           |                         |                 | 35.5                    | 0.02            |
| <b>Ovalbumin</b> | 0                     | 1.376         | 0.003           | 45.83                   | 0.45            | 32.27                   | 0.33            |
|                  | 50                    | 1.373         | 0.002           | 45.21                   | 0.12            | 32.46                   | 0.021           |
|                  | 100                   | 1.371         | 0.003           | 44.34                   | 0.1             | 32.8                    | 0.021           |
|                  | 150                   | 1.368         | 0.002           | 43.51                   | 0.11            | 33.16                   | 0.035           |
|                  | 200                   | 1.366         | 0.002           | 42.54                   | 0.11            | 33.66                   | 0.049           |
|                  | 250                   | 1.364         | 0.002           | 41.61                   | 0.15            | 34.12                   | 0.001           |
| <b>Lysozyme</b>  | 0                     | 1.378         | 0.003           |                         |                 | 32.27                   | 0.33            |
|                  | 20                    | 1.376         | 0.002           |                         |                 | 32.36                   | 0.02            |
|                  | 40                    | 1.375         | 0.002           |                         |                 | 32.46                   | 0.01            |
|                  | 60                    | 1.372         | 0.002           |                         |                 | 32.64                   | 0.02            |
|                  | 80                    | 1.37          | 0.002           |                         |                 | 32.81                   | 0.02            |
|                  | 100                   | 1.368         | 0.002           |                         |                 | 32.94                   | 0.01            |

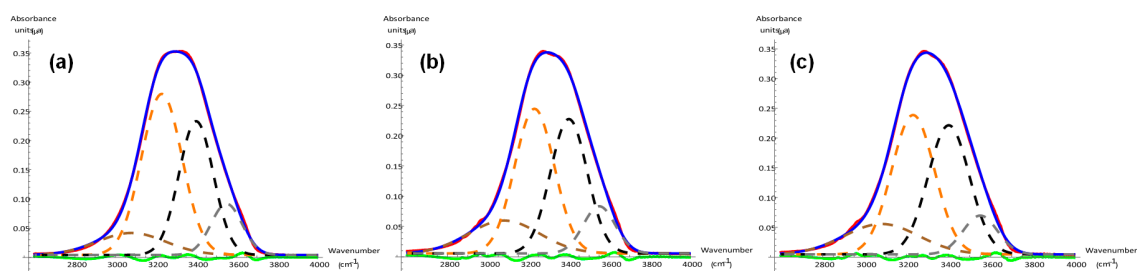

**Figure S1.** Examples of the ATR-FTIR spectra of OH-stretch band in the solvent for (a) 0.15 M NaCl in 0.01 M Na-phosphate buffer, pH 7.4 (PBS), and in solutions of two proteins, (b) human serum albumin at a concentration of 100 mg/mL in PBS, and (c)  $\beta$ -lactoglobulin A at a concentration of 300 mg/mL in PBS.

## References

1. N. Kitadai, T. Sawai, R. Tonoue, S. Nakashima, M. Katsura, K. Fukushi, Effects of ions on the OH stretching band of water as revealed by ATR-IR spectroscopy, *J. Solution Chem.* 2014, 43, 1055–1077.
